# Supplementary material
Source: PubMed Central journal article supplement (PMC4617209)
Supplement: NIHMS404389-supplement-01.pdf [file NIHMS404389-supplement-01.pdf]

## **Supplementary Figures**

Figure S1

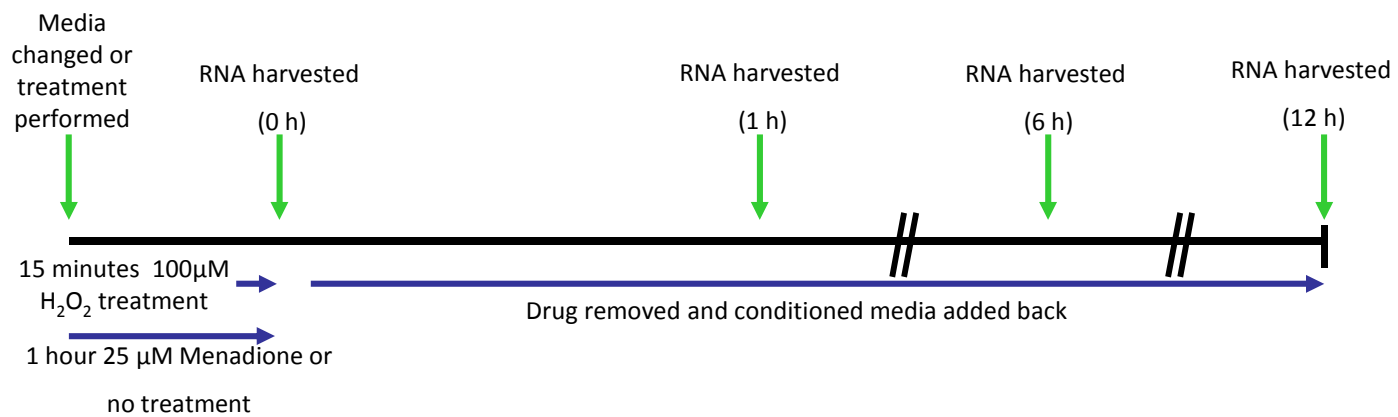

A

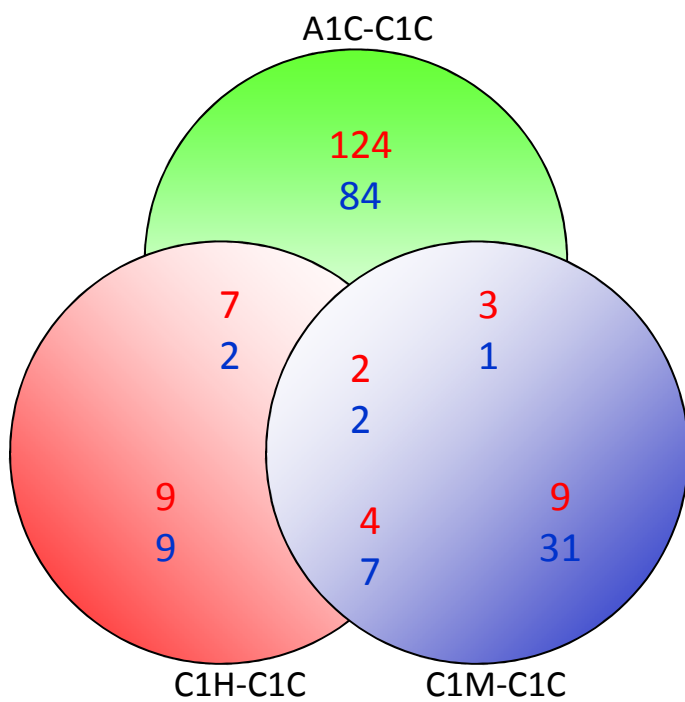

B

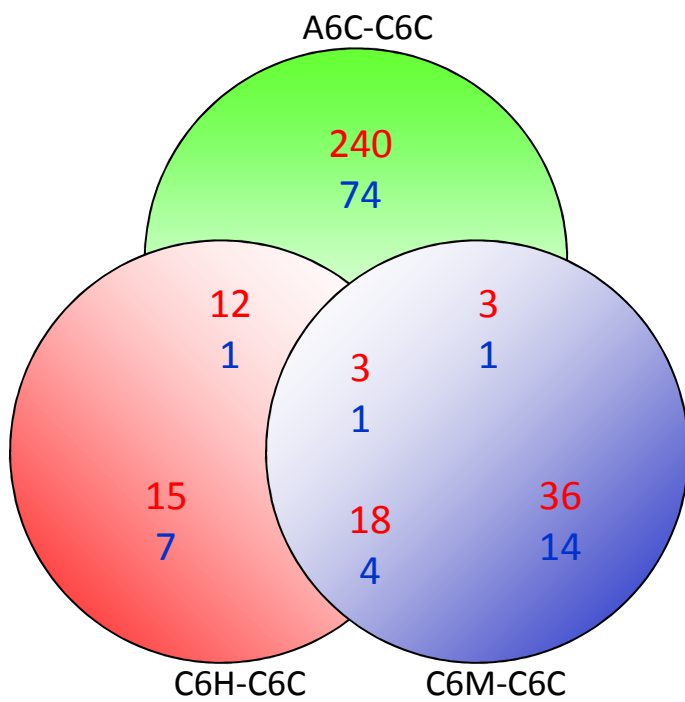

Figure S2

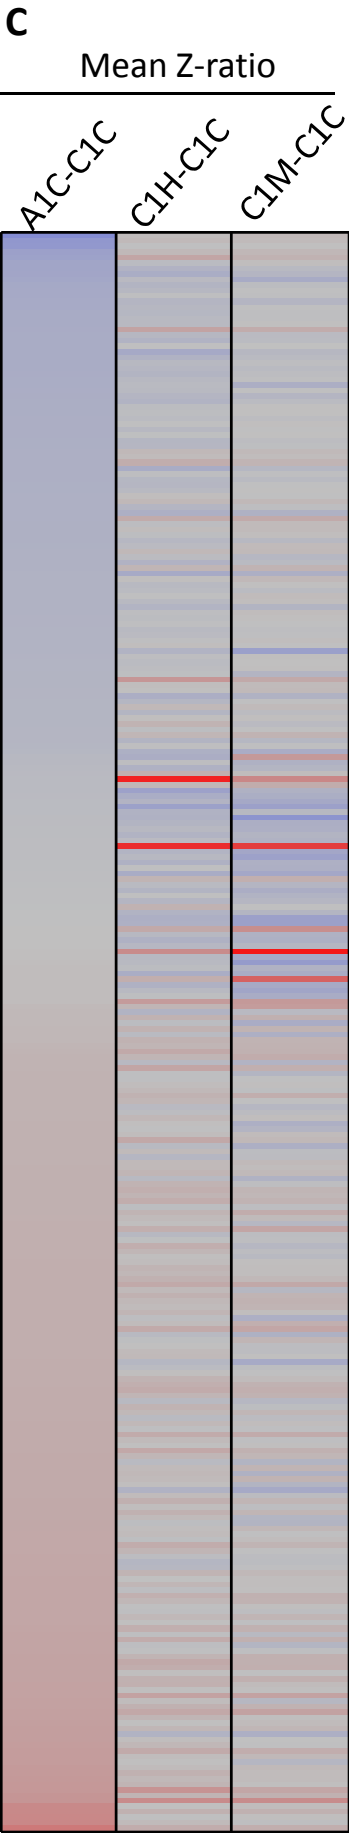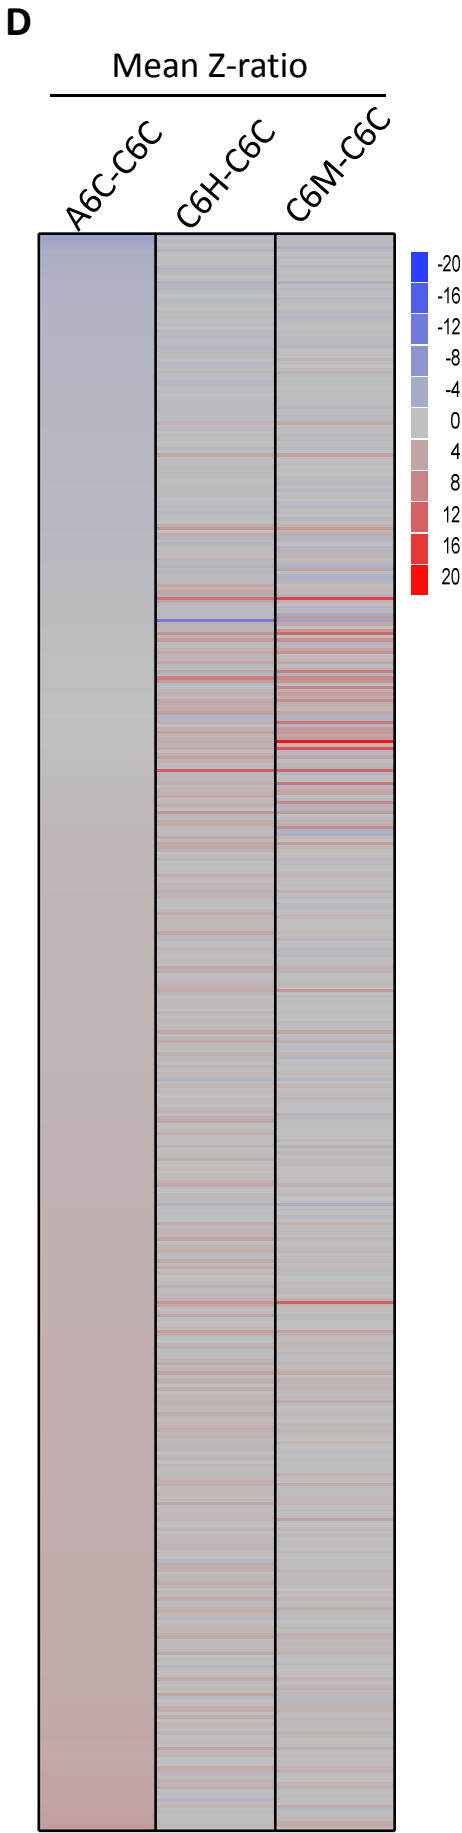

Figure S3

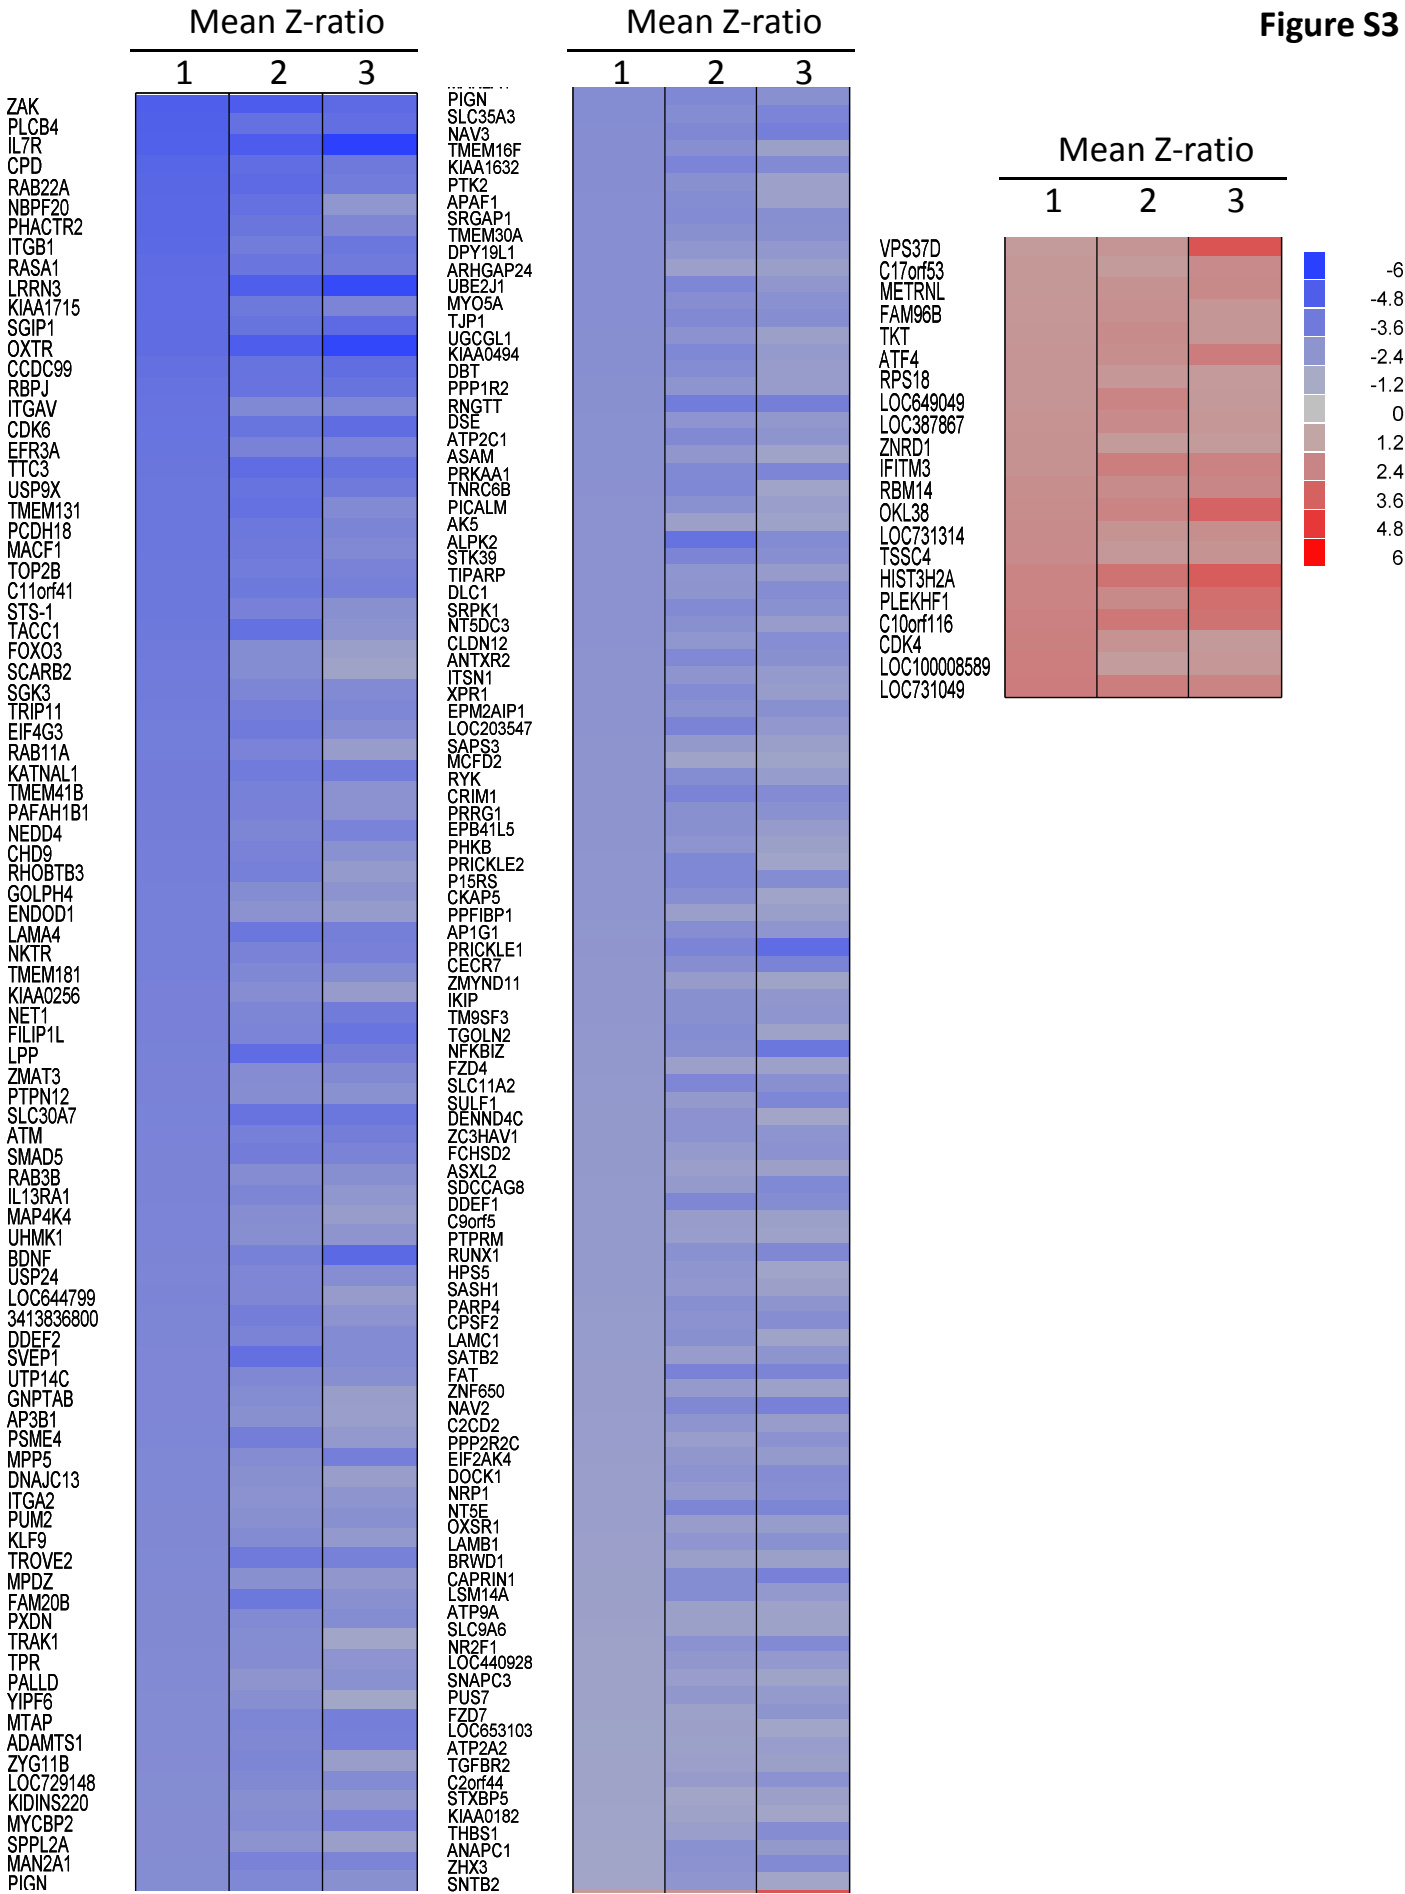

Figure S4

Mean Z-score

GO0005515 PROTEIN BINDING  
 GO0016020 MEMBRANE  
 GO0005794 GOLGI APPARATUS  
 GO0015031 PROTEIN TRANSPORT  
 GO0005737 CYTOPLASM  
 GO00051020 GTPASE BINDING  
 GO0000166 NUCLEOTIDE BINDING  
 GO00005783 ENDOPLASMIC RETICULUM  
 GO0005524 ATP BINDING  
 GO00005768 ENDOSOME  
 GO00006512 UBIQUITIN CYCLE  
 GO0016021 INTEGRAL TO MEMBRANE  
 GO00006886 INTRACELLULAR PROTEIN TRANSPORT  
 GO00006810 TRANSPORT  
 GO00006468 PROTEIN AMINO ACID PHOSPHORYLATION  
 GO00004674 PROTEIN SERINE OR THREONINE KINASE ACTIV  
 GO00005488 BINDING  
 GO00006897 ENDOCYTOSIS  
 GO00004672 PROTEIN KINASE ACTIVITY  
 GO00042598 VESICULAR FRACTION  
 GO0001578 MICROTUBULE BUNDLE FORMATION  
 GO00008565 PROTEIN TRANSPORTER ACTIVITY  
 GO0016192 VESICLE MEDIATED TRANSPORT  
 GO00005099 RAS GTPASE ACTIVATOR ACTIVITY  
 GO0004221 UBIQUITIN THIOLESTERASE ACTIVITY  
 GO00046825 REGULATION OF PROTEIN EXPORT FROM NUCLEU  
 GO00008305 INTEGRIN COMPLEX  
 GO00004386 HELICASE ACTIVITY  
 GO0003676 NUCLEIC ACID BINDING  
 GO0005856 CYTOSKELETON  
 GO0019905 SYNTAXIN BINDING  
 GO0007229 INTEGRIN MEDIATED SIGNALING PATHWAY  
 GO00006613 COTRANSLATIONAL PROTEIN TARGETING TO MEM  
 GO00008234 CYSTEINE TYPE PEPTIDASE ACTIVITY  
 GO00030900 FOREBRAIN DEVELOPMENT  
 GO0048471 PERINUCLEAR REGION OF CYTOPLASM  
 GO0001933 NEGATIVE REGULATION OF PROTEIN AMINO ACI  
 GO0016358 DENDRITE DEVELOPMENT  
 GO00051015 ACTIN FILAMENT BINDING  
 GO00006417 REGULATION OF TRANSLATION  
 GO0016787 HYDROLASE ACTIVITY  
 GO00005089 RHO GUANYL NUCLEOTIDE EXCHANGE FACTOR AC  
 GO00030140 TRANS GOLGI NETWORK TRANSPORT VESICLE  
 GO00008026 ATP DEPENDENT HELICASE ACTIVITY  
 GO00008233 PEPTIDASE ACTIVITY  
 GO0016477 CELL MIGRATION  
 GO0016323 BASOLATERAL PLASMA MEMBRANE  
 GO00006607 NLS BEARING SUBSTRATE IMPORT INTO NUCLEU  
 GO00003779 ACTIN BINDING  
 GO00004614 PHOSPHOGLUCOMUTASE ACTIVITY  
 GO00007163 ESTABLISHMENT AND OR OR MAINTENANCE OF C  
 GO00007155 CELL ADHESION  
 GO00006464 PROTEIN MODIFICATION PROCESS  
 GO00043558 REGULATION OF TRANSLATION INITIATION IN  
 GO00003724 RNA HELICASE ACTIVITY  
 GO00008340 DETERMINATION OF ADULT LIFE SPAN  
 GO00048812 NEURITE MORPHOGENESIS  
 GO0001934 POSITIVE REGULATION OF PROTEIN AMINO ACI  
 GO0019717 SYNAPTOSOME  
 GO0004842 UBIQUITIN PROTEIN LIGASE ACTIVITY  
 GO0005388 CALCIUM TRANSPORTING ATPASE ACTIVITY  
 GO0035022 POSITIVE REGULATION OF RAC PROTEIN SIGNA  
 GO0003682 CHROMATIN BINDING  
 GO0005083 SMALL GTPASE REGULATOR ACTIVITY  
 GO0006906 VESICLE FUSION  
 GO0005977 GLYCOGEN METABOLIC PROCESS  
 GO0017048 RHO GTPASE BINDING  
 GO0016301 KINASE ACTIVITY  
 GO0016740 TRANSFERASE ACTIVITY  
 GO0005575 CELLULAR COMPONENT  
 GO00003777 MICROTUBULE MOTOR ACTIVITY  
 GO0005634 NUCLEUS  
 GO0030054 CELL JUNCTION  
 GO0016887 ATPASE ACTIVITY  
 GO0007243 PROTEIN KINASE CASCADE  
 GO00030675 RAC GTPASE ACTIVATOR ACTIVITY  
 GO0046839 PHOSPHOLIPID DEPHOSPHORYLATION  
 GO0045648 POSITIVE REGULATION OF ERYTHROCYTE DIFFE  
 GO0005096 GTPASE ACTIVATOR ACTIVITY  
 GO0019209 KINASE ACTIVATOR ACTIVITY  
 GO0004652 POLYNUCLEOTIDE ADENYLYLTRANSFERASE ACTIV  
 GO0030316 OSTEOCLAST DIFFERENTIATION  
 GO0031941 FILAMENTOUS ACTIN  
 GO00050508 GLUCURONOSYL N ACETYLGUCOSAMINYL PROTE  
 GO0005085 GUANYL NUCLEOTIDE EXCHANGE FACTOR ACTIVI  
 GO00030676 RAC GUANYL NUCLEOTIDE EXCHANGE FACTOR AC  
 GO0006817 PHOSPHATE TRANSPORT  
 GO0042147 RETROGRADE TRANSPORT ENDOSOME TO GOLGI  
 GO0005874 MICROTUBULE  
 GO0035023 REGULATION OF RHO PROTEIN SIGNAL TRANSDU  
 GO0008630 DNA DAMAGE RESPONSE SIGNAL TRANSDUCTION  
 GO0030027 LAMELLIPODIUM  
 GO0016874 LIGASE ACTIVITY  
 GO0000287 MAGNESIUM ION BINDING  
 GO0035257 NUCLEAR HORMONE RECEPTOR BINDING  
 GO0017111 NUCLEOSIDE TRIPHOSPHATASE ACTIVITY  
 GO0007368 DETERMINATION OF LEFT OR RIGHT SYMMETRY  
 GO0031397 NEGATIVE REGULATION OF PROTEIN UBIQUITIN  
 GO0004065 ARYLSULFATASE ACTIVITY  
 GO0030020 EXTRACELLULAR MATRIX STRUCTURAL CONSTITU  
 GO0004307 ETHANOLAMINEPHOSPHOTRANSFERASE ACTIVITY  
 GO00050679 POSITIVE REGULATION OF EPITHELIAL CELL P  
 GO0042733 EMBRYONIC DIGIT MORPHOGENESIS  
 GO0042110 T CELL ACTIVATION  
 GO0007185 TRANSMEMBRANE RECEPTOR PROTEIN TYROSINE  
 GO0030512 NEGATIVE REGULATION OF TRANSFORMING GROV  
 GO0045859 REGULATION OF PROTEIN KINASE ACTIVITY  
 GO0031573 INTRA S DNA DAMAGE CHECKPOINT

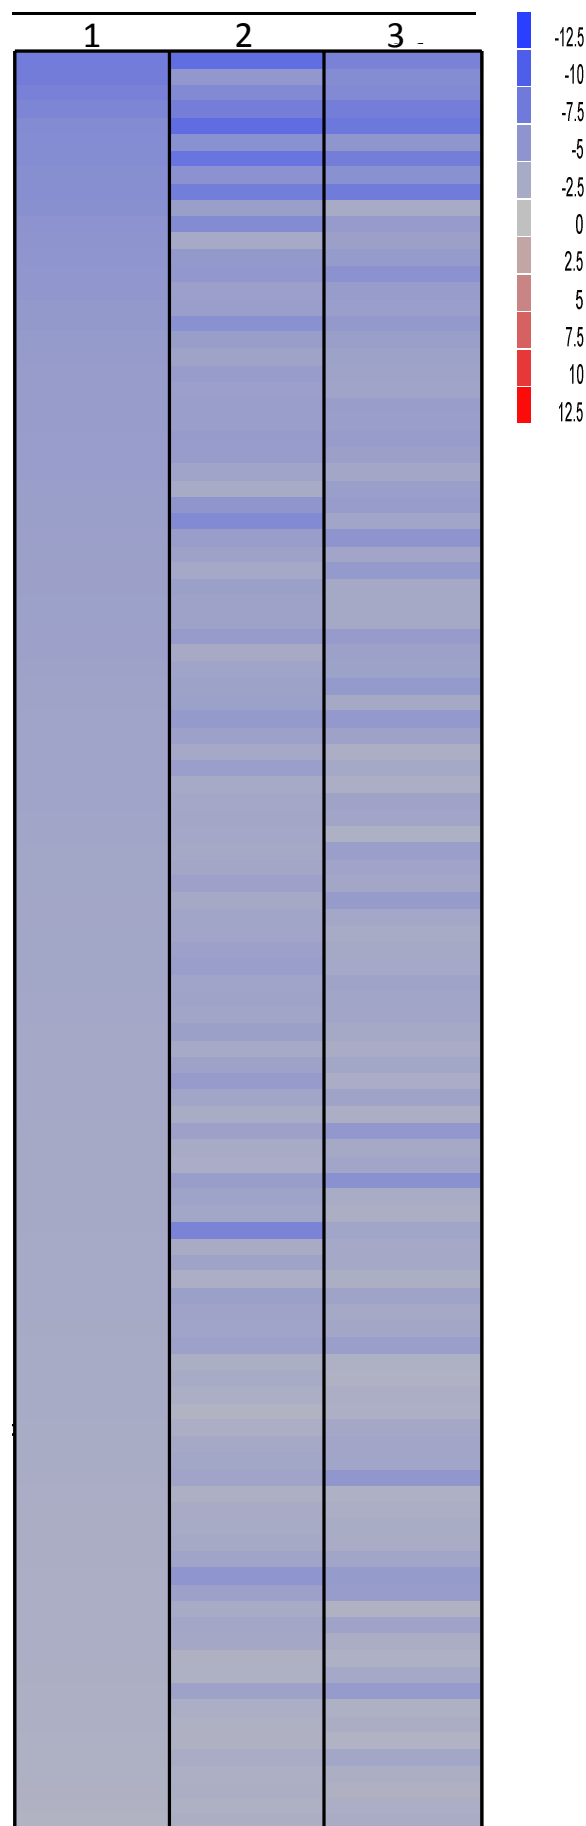

Figure S4

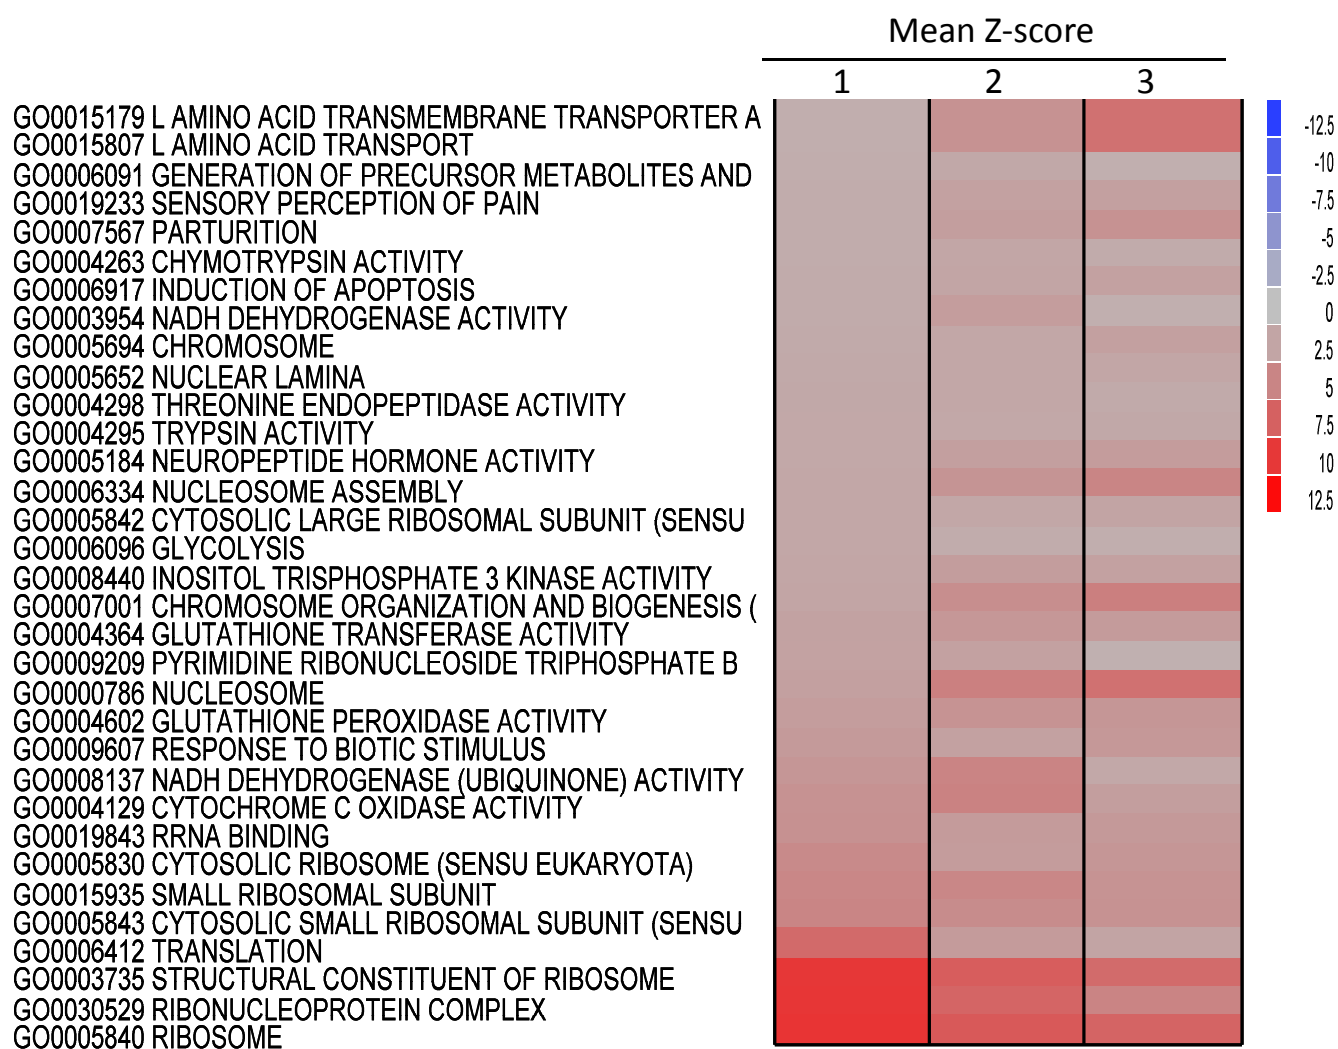

Figure S5

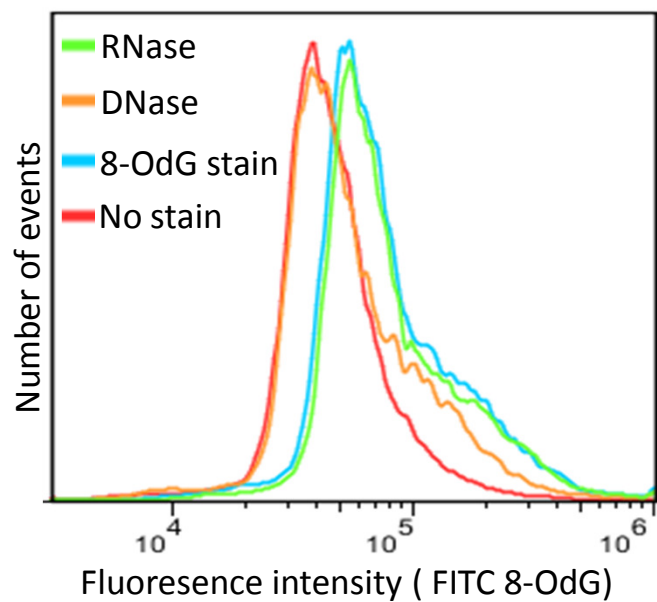



Probe sets used for validation

| TAQ probe | TAQ probe     |
|-----------|---------------|
| APAF      | Hs00559441_m1 |
| DLC1      | Hs00183436_m1 |
| IL6       | Hs00985639_m1 |
| ATM       | Hs01112307_m1 |
| CHD9      | Hs00322236_m1 |
| PTPN12    | Hs01026371_m1 |
| TROVE2    | Hs00184747_m1 |
| EIFG3     | Hs00184747_m1 |
| 18S       | Hs99999999_s1 |
